# Supplementary material for: A room temperature sub-ppm NO2 gas sensor based on WO3 hollow spheres
Source: Royal Society of Chemistry journal article supplement (doi:10.1039/c9nj06384f), 2020-01-01
Supplement: c9nj06384f1.pdf [file c9nj06384f1.pdf]

## Supplementary Information for New Journal of Chemistry

### Room temperature sub-ppm NO<sub>2</sub> gas sensor based on WO<sub>3</sub> hollow spheres

Jing Zhao,<sup>a</sup> Mengqing Hu,<sup>b</sup> Yan Liang,<sup>b</sup> Qiulin Li,<sup>b</sup> Xinye Zhang<sup>b</sup> and Zhenyu Wang<sup>\*b</sup>

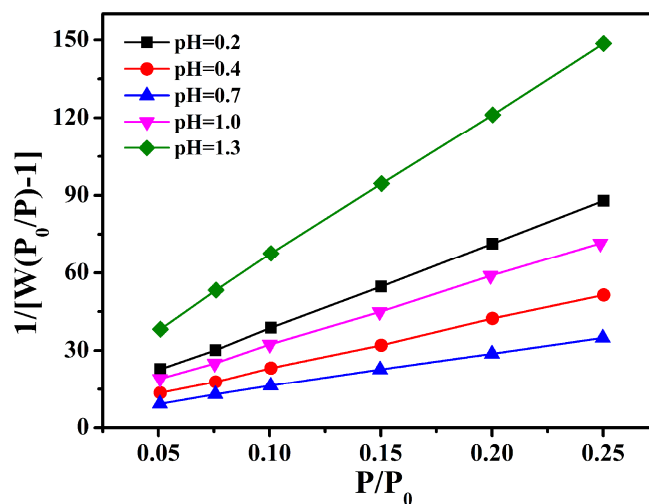

Fig.S1 Relationship curves between  $[W(P_0/P)-1]^{-1}$  and  $(P/P_0)$  for the WO<sub>3</sub> samples.
